# Supplementary material for: The osteoprotective role of USP26 in coordinating bone formation and resorption
Source: PubMed Central journal article supplement (PMC9177963; doi:10.1038/s41418-021-00904-x), 2022-01-29
Supplement: 41418_2021_904_MOESM1_ESM.pdf [file 41418_2021_904_MOESM1_ESM.pdf]

# 1 Supplementary files

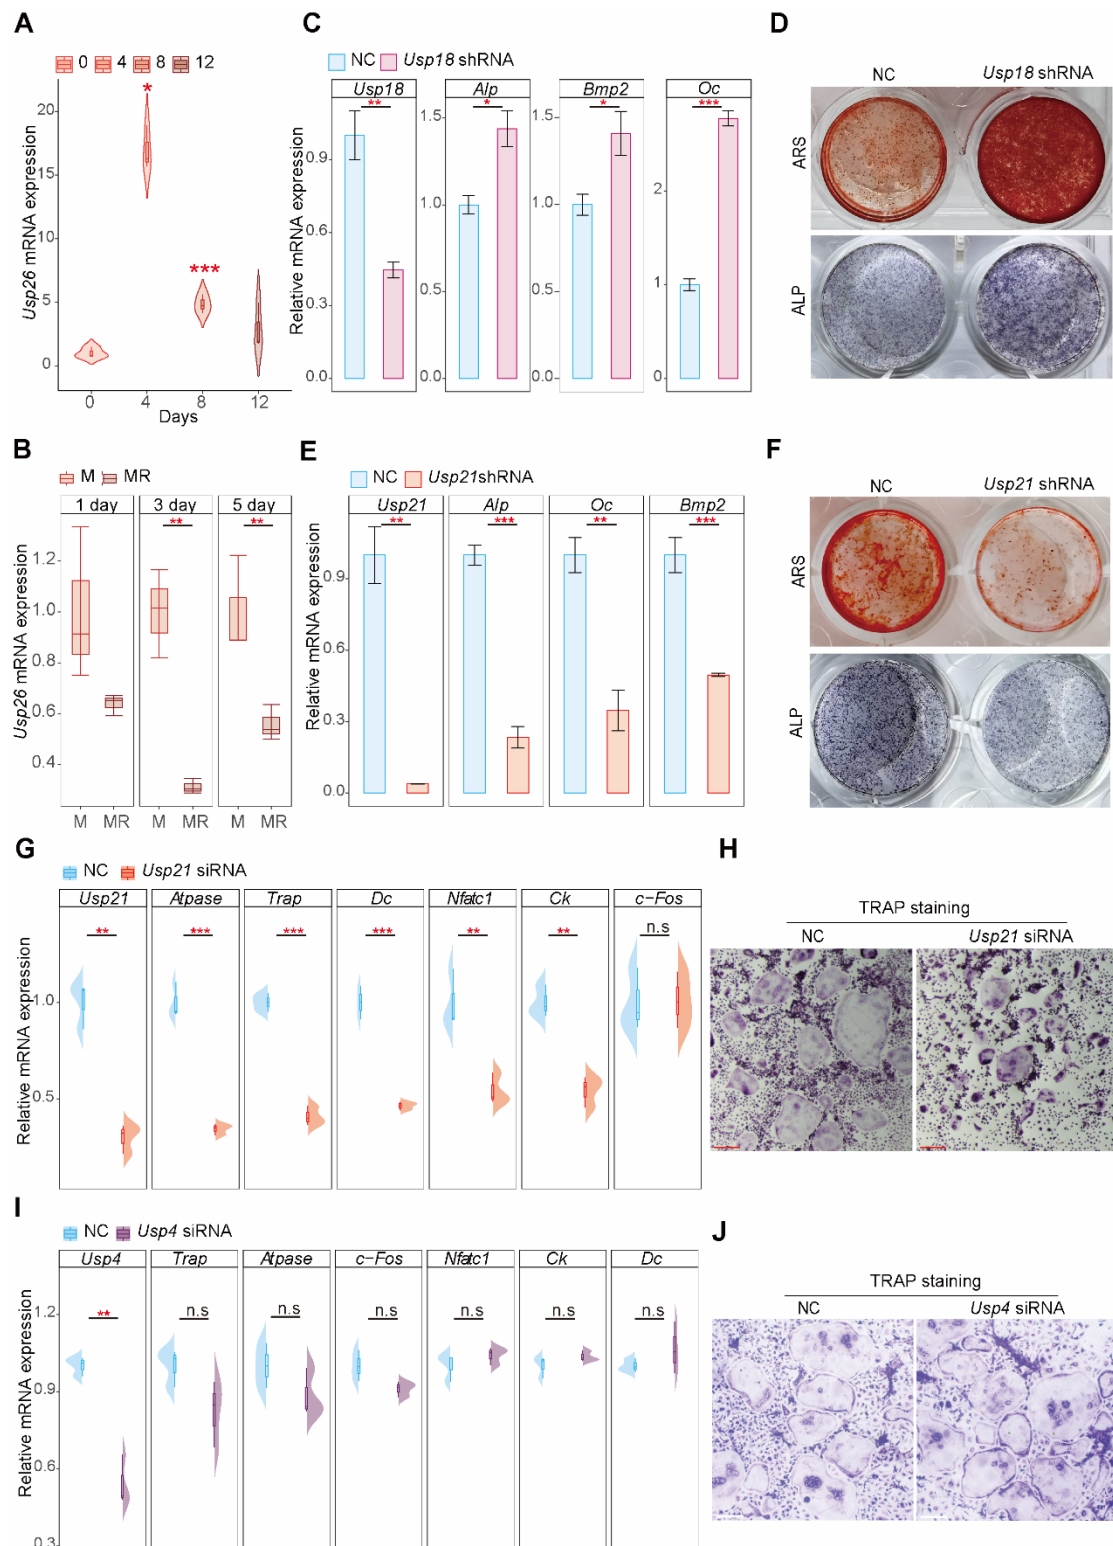

2

3 **Fig. S1. *Usp26* expression during osteoblastic and osteoclastic**  
 4 **differentiation, and the effect of *Usp18*, *Usp21*, or *Usp4* deletion on**

5 **osteoblastic or osteoclastic differentiation.** (A) Time curve of *Usp26*  
6 expression in MSCs after different days of osteoblastic differentiation. (B)  
7 Time curve of *Usp26* expression in BMMs after different days of  
8 osteoclastic differentiation. (C-F) The osteoblastic genes expression, ARS  
9 and ALP staining of MSCs with or without *Usp18* or *Usp21* knockdown  
10 after 8 days of osteoblastic differentiation. (G and I) The osteoclastic genes  
11 expression of BMMs with or without *Usp21* or *Usp4* deletion after 3 days  
12 of osteoclastic differentiation. (H and J) The TRAP staining of  
13 multinucleated osteoclasts formation of BMMs with or without *Usp21* or  
14 *Usp4* deletion after 5 days of osteoclastic differentiation. \* $P < 0.05$ ,  
15 \*\* $P < 0.01$ , \*\*\* $P < 0.001$ . *P*-values were analyzed by one-way ANOVA in  
16 (A) and two-tailed *t* tests in (B, C, E, G, I). All data are representative of  
17 two independent experiments.

18

19

20

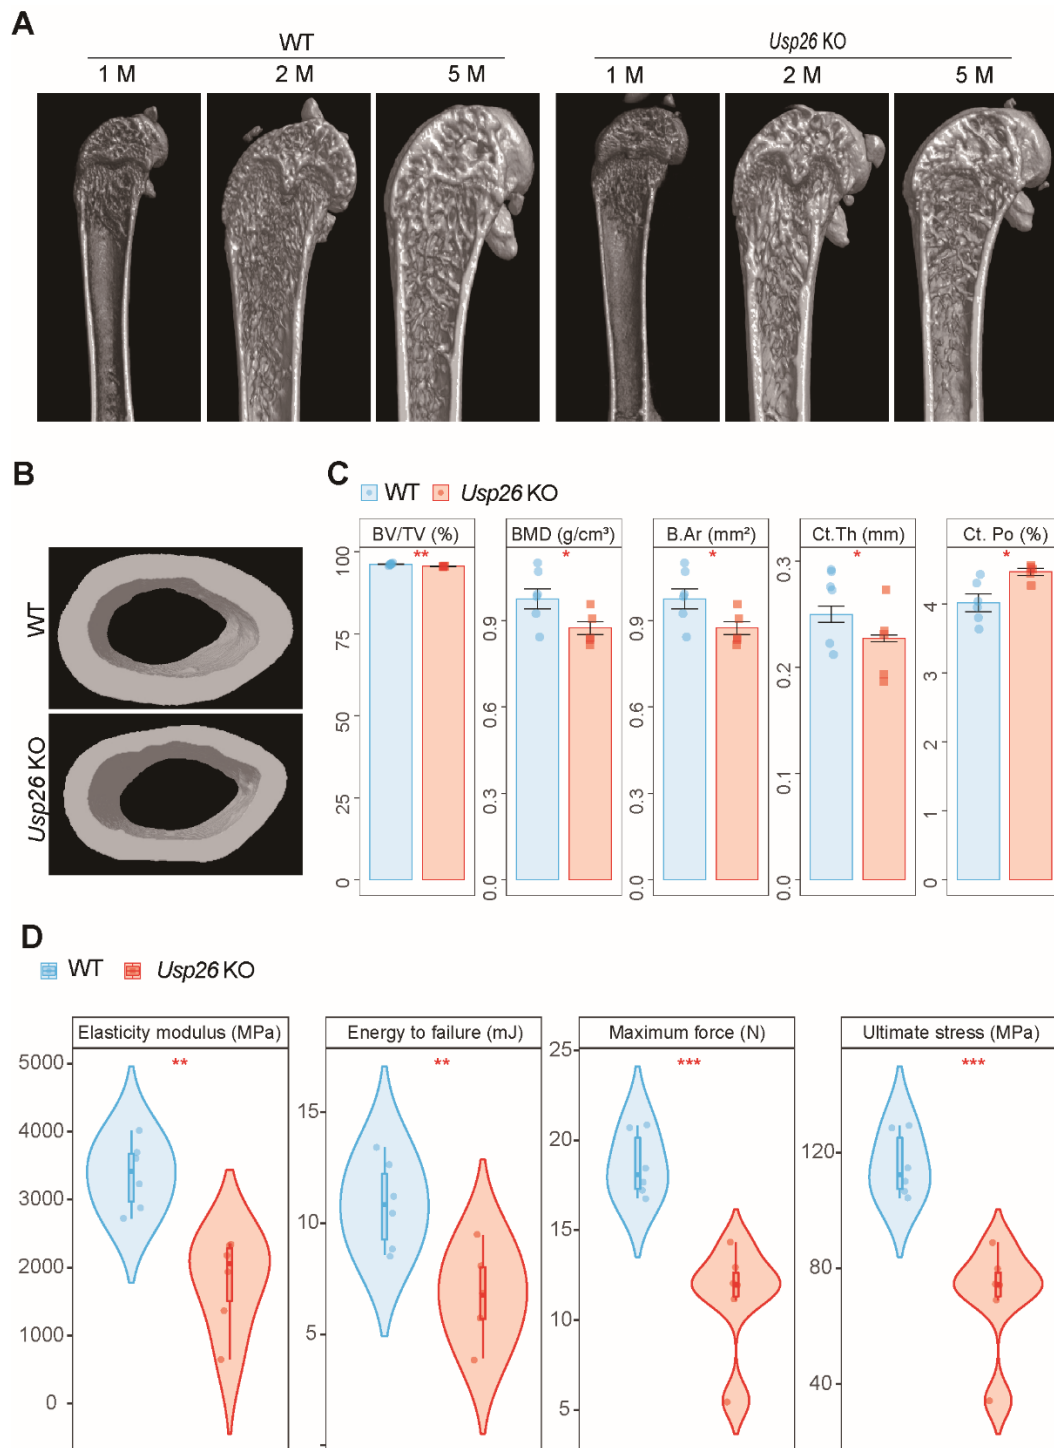

**Fig. S2. *Usp26*<sup>-/-</sup> mice have reduced bone mass and poor bone strength.**

(A) Representative micro-CT images of femur bones of 1-, 2- and 5-month-old *Usp26*<sup>-/-</sup> mice and their WT littermates (*n*=5). (B) Representative micro-CT images of cortical bone from the femoral metaphysis of 5-month-old *Usp26*<sup>-/-</sup> mice and their WT littermates (*n*=6). (C) The cortical

21

22

23

24

25

26

27 bone volume (BV/TV, %), bone mineral density (BMD, g/cm<sup>3</sup>), cortical  
28 thickness (Cb.Th, mm), total cross sectional cortical bone area (B. Ar,  
29 mm<sup>2</sup>), and cortical porosity (Ct.Po, %) were determined by micro-CT  
30 analysis ( $n=6$ ). (D) Maximum force and elasticity modulus analyzed using  
31 three-point bending test, including elasticity modulus (MPa), energy to  
32 failure (mJ), maximum force (N), and ultimate stress (MPa) ( $n=6$ ).  
33 \* $P<0.05$ , \*\* $P<0.01$ , \*\*\* $P<0.001$ .  $P$ -values were analyzed by one-tailed  $t$   
34 tests. All data are representative of two to three independent experiments.

35

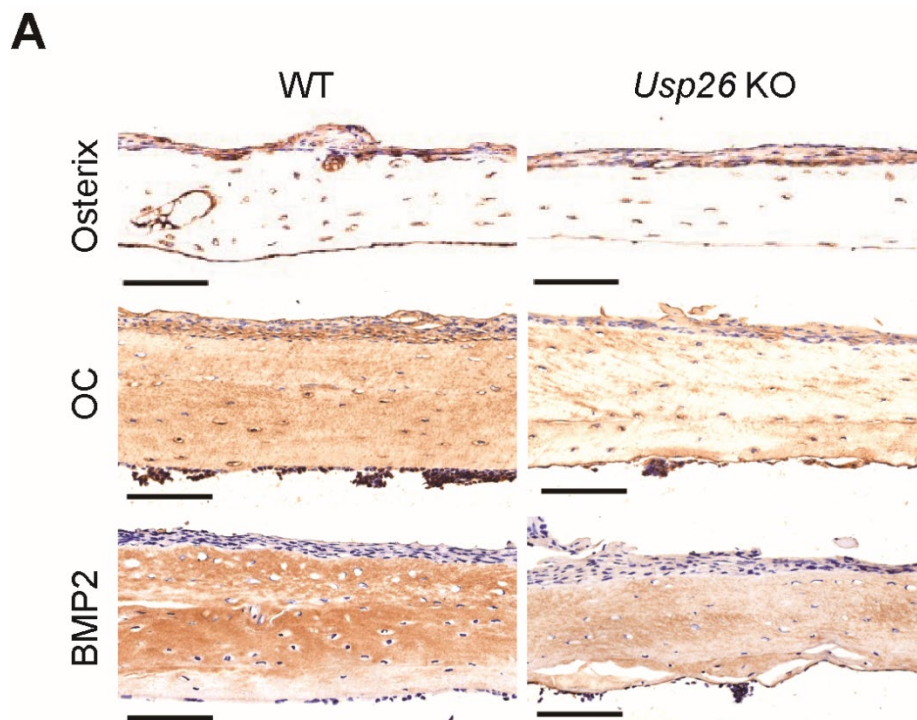

36

37 **Fig. S3.** (A) Osterix, OC and BMP2 immunohistochemical staining in  
38 femurs of 5-month-old  $Usp26^{-/-}$  mice and their wild-type (WT) littermates  
39 ( $n=6$ ). Scale bars represent 100  $\mu$ m. All data are representative of two  
40 independent experiments.

41

1 matqadlmel dmameprka avshwqqqsy ldsgihsgat ttapslsgkg npeedvdts  
61 qvlyeweqgf sqsftqeqva didgqyamtr aqrvraamfp etldegmqip stqfdaahpt  
121 nvqrlaepsq mlkhavvni nyqddaelat raipeltkll ndedqvvnk aavmvhqlsk  
181 keasrhaimr spqmvsair tmqntndvet arctagtlhn lshhreglla ifksggipal  
241 vkmlgspvds vlfyaittlh nlllhqegak mavrlagglq kmvallnktk vkflaittdc  
301 lqilaygnqe skliilasgg pqualvnmrt ytyekllwtt srvlkvlsv ssnkpaivea  
361 ggmqalglhl tdpsqrlvqn clwtlrnlsd aatkqegmeg llgtlvqllg sddinvvtca  
421 agilsnltn nyknkmmvcq vggiealvrt vlragdredi tepaicalrh lsrhqaem  
481 aqnavrlhyg **lpvvvklhlp** pshwplikat vglirnlalc **panhaplreq** **gaiprlvqll**  
541 **vrahqdtqrr** tsmggtqqqf vegvrmeev egctgalhil ardvhnrvivi rglntiplfv  
601 qllyspieni qrvaagvlce laqdkeaea ieaegatapl tellhsrneg vatyaaavlf  
661 rmsedkpqdy kkrslvelts slfrtepmaw netadlgldi gaqgealgyr qddpsyrsfh  
721 sggygqdalq mdpmmehemg ghhpqadypv dglpdlghaq dlmdglppgd snqlawfdd  
781 I

42

43 **Fig. S4. Sequences of the  $\beta$ -catenin protein and peptides identified by**  
44 **liquid chromatography-tandem mass spectrometry.** The identified  
45 peptide sequences are shown in red.

46

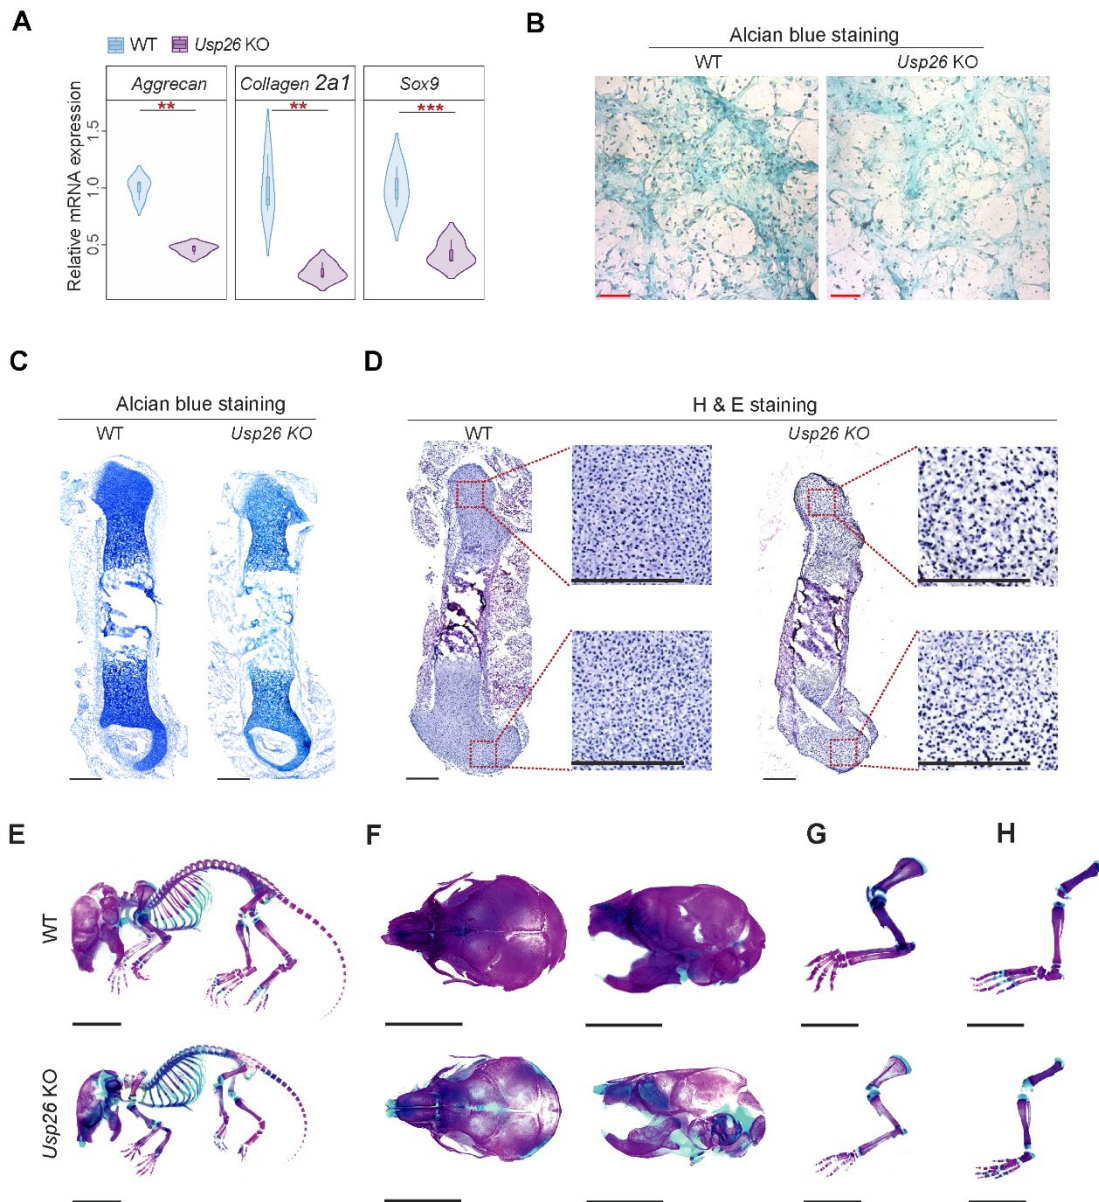

47

48 **Fig. S5. *Usp26* deletion impaired chondrogenesis of MSCs, resulted in**  
 49 **decreased chondrocyte formation and abnormal early skeletal**  
 50 **development.** (A) Quantification analysis of *Aggrecan*, *Collagen 2a1*, and  
 51 *Sox9* expression in WT and *Usp26*<sup>-/-</sup> MSCs after 14 days of chondrogenic  
 52 differentiation. (B) Alcian blue staining of WT and *Usp26*<sup>-/-</sup> MSCs after 14  
 53 days of chondrogenic differentiation. Scale bars represent 20 μm. (C and  
 54 D) Alcian blue and H&E staining of femoral sections from E16.5 WT and  
 55 *Usp26*<sup>-/-</sup> mice (n=5). Scale bars represent 20 μm. (E-H) Alcian blue/alizarin

56 red staining of the whole skeleton (E), calvaria (F), forelimb (G), and  
57 hindlimb (H) from 1-week-old WT and *Usp26*<sup>-/-</sup> male littermates (*n*=3).  
58 Scale bars represent 1 cm. \*\**P*<0.01, \*\*\**P*<0.001. *P*-values were  
59 analyzed by one-tailed *t* tests. All data are representative of two  
60 independent experiments.

61

62

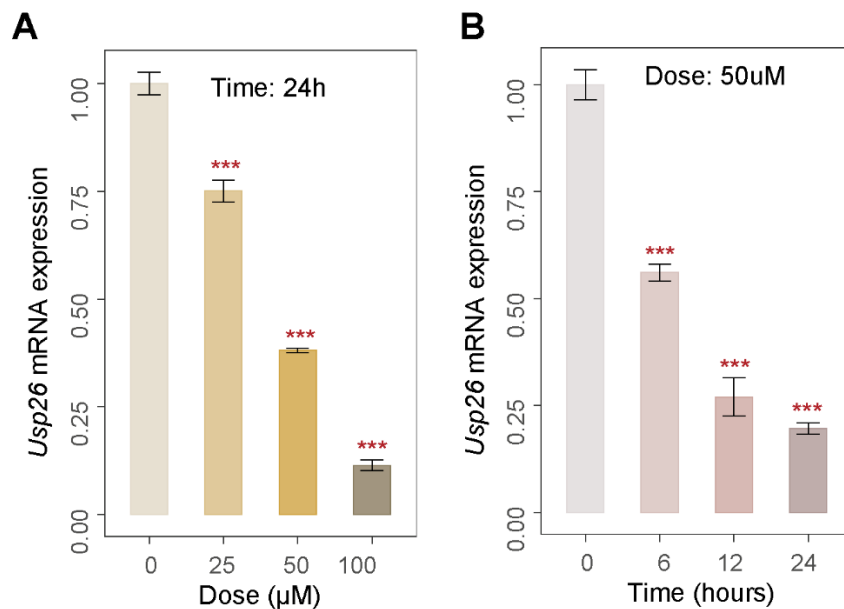

63

64 **Fig. S6. Oxidative stress inhibited *Usp26* expression in MSCs.** (A and  
65 B) Dose- and time-dependent expression of *Usp26* in MSCs exposed to  
66 H<sub>2</sub>O<sub>2</sub>. \*\*\**P*<0.001. *P*-values were analyzed by one-way ANOVA. All data  
67 are representative of two independent experiments.

68

69

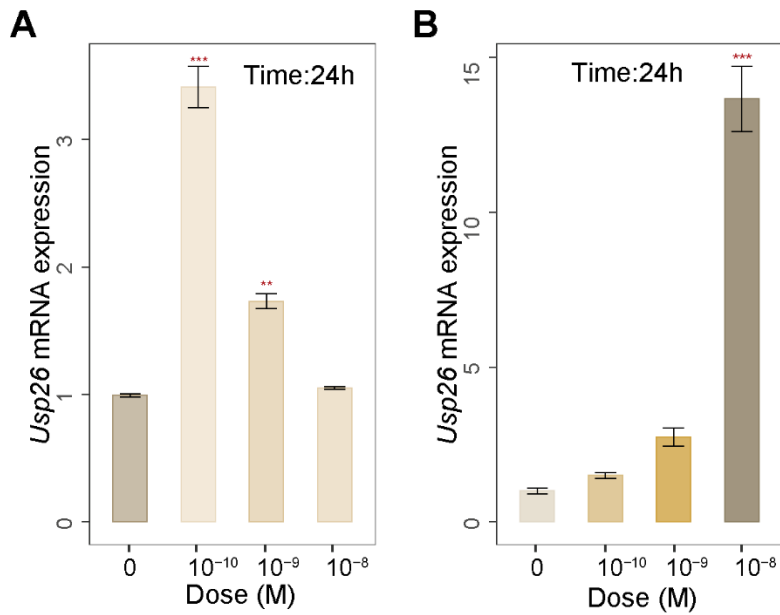

70

71 **Fig. S7. Estrogen induced *Usp26* expression in BMMs and MSCs.** (A  
 72 and B) Dose- dependent expression of *Usp26* in BMMs (A) and MSCs (B)  
 73 exposed to estrogen. \*\* $P < 0.01$ , \*\*\* $P < 0.001$ .  $P$ -values were analyzed by  
 74 one-way ANOVA. All data are representative of two independent  
 75 experiments.

76

77

78

79

80

81

82

83

84

85

86

87

88

89

90

91

92

93 **Table S1. Primer sequences for real time-PCR**



| Gene                                 |         | Primer sequence (5'-3')  |
|--------------------------------------|---------|--------------------------|
| <i>Trap</i>                          | FORWARD | CACTCCCACCCTGAGATTTGT    |
|                                      | REVERSE | CATCGTCTGCACGGTTCTG      |
| <i>C-Fos</i>                         | FORWARD | CGGGTTTCAACGCCGACTA      |
|                                      | REVERSE | TTGGCACTAGAGACGGACAGA    |
| <i>Cathepsin k</i>                   | FORWARD | GAAGAAGACTCACCAGAAGCAG   |
|                                      | REVERSE | TCCAGGTTATGGGCAGAGATT    |
| <i>DC-STAMP</i>                      | FORWARD | GGGGACTTATGTGTTTCCACG    |
|                                      | REVERSE | ACAAAGCAACAGACTCCCAAAT   |
| <i>V-atpase <math>\alpha</math>3</i> | FORWARD | CACAGGGTCTGCTTACAACCTG   |
|                                      | REVERSE | CGTCTACCACGAAGCGTCTC     |
| <i>Nfatc1</i>                        | FORWARD | GACCCGGAGTTCGACTTCG      |
|                                      | REVERSE | TGACACTAGGGGACACATAACTG  |
| <i>Osterix</i>                       | FORWARD | ATGGCGTCCCTCTGCTTG       |
|                                      | REVERSE | TGAAAGGTCAGCGTATGGCTT    |
| <i>Runx2</i>                         | FORWARD | CCACCACTACTACCACACG      |
|                                      | REVERSE | GGACGCTGACGAAGTACCAT     |
| <i>Osteocalcin</i>                   | FORWARD | CCTGACTGCATTCTGCCTCT     |
|                                      | REVERSE | AGGTAGCGCCGGAGTCTATT     |
| <i>Bmp-2</i>                         | FORWARD | GAAGCCAGGTGTCTCCAAGA     |
|                                      | REVERSE | GGATGTCCTTACCCTCGTG      |
| <i>Alp</i>                           | FORWARD | GACAAGAAGCCCTTCACAGC     |
|                                      | REVERSE | ACTGGGCTGGTAGTTGTTG      |
| <i>Col2a1</i>                        | FORWARD | CCACACCAAATTCCTGTTC      |
|                                      | REVERSE | ACTGGTAAGTGGGGCAAGAC     |
| <i>Aggrecan</i>                      | FORWARD | AGGACCTGGTAGTGCAGTG      |
|                                      | REVERSE | GCGTGTGGCGAAGAA          |
| <i>Sox9</i>                          | FORWARD | CCACGGAACAGACTCACATCTCTC |
|                                      | REVERSE | CTGCTCAGTTCACCGATGTCCACG |
| <i>Usp1</i>                          | FORWARD | ACAGATGAACTTGCTACACAGC   |
|                                      | REVERSE | AGGAGTTGGCATGTTTCTTGAA   |
| <i>Usp2</i>                          | FORWARD | CACAGCAGTCTTTCCCTTCG     |
|                                      | REVERSE | CATCTGTGTAGCGGGACGAT     |
| <i>Usp3</i>                          | FORWARD | ACAGTGTGTATGGATTGCAGTAG  |
|                                      | REVERSE | CCTGTCCGCTGTAAAGGCT      |
| <i>Usp4</i>                          | FORWARD | GGGGCGCAGTGGTATCTTATT    |
|                                      | REVERSE | GAAACAGGTTATGCTCCCGA     |
| <i>Usp5</i>                          | FORWARD | TGTCAGTGTACCACGATCC      |
|                                      | REVERSE | CCGGCGTGTGAAAGAGAAA      |
| <i>Usp6</i>                          | FORWARD | TCCGACCAGGATGTAGCACTC    |
|                                      | REVERSE | CTTCCCAGGGCTCGATCTCT     |
| <i>Usp7</i>                          | FORWARD | CCACAAGGAAAACGACTGGG     |
|                                      | REVERSE | GTAACACGTTGCTCCCTGATT    |

---

|              |         |                         |
|--------------|---------|-------------------------|
| <i>Usp8</i>  | FORWARD | CTGCTAGTTGGATTGAAGCAAAC |
|              | REVERSE | AGTGCATCTTTCAGACTCCGTA  |
| <i>Usp9</i>  | FORWARD | AGCCATCCGAATGGTTCGC     |
|              | REVERSE | ACAAGTGTTTTCCACGAAATGC  |
| <i>Usp10</i> | FORWARD | GTCATCGAACCTAGTGAGGGG   |
|              | REVERSE | CCAAGGATAAATTCGGGTGCC   |
| <i>Usp11</i> | FORWARD | GGCTGTATCAACAATGCTGGG   |
|              | REVERSE | TCATCTCCTTCTAGCAGTCTCTC |
| <i>Usp12</i> | FORWARD | CAGTCTCCAAATTCGCCTCCA   |
|              | REVERSE | GTGCTCGTTGACCGGAAACT    |
| <i>Usp13</i> | FORWARD | CACATGGGAAAACGAAGTGCC   |
|              | REVERSE | GCCGTCAGTCAGATTCAACCA   |
| <i>Usp14</i> | FORWARD | ATGCCACTTACTCTGTTACAGT  |
|              | REVERSE | AACACCATTGGAGGTTTCATCAG |
| <i>Usp15</i> | FORWARD | GACGCTGCTAAAACCTCG      |
|              | REVERSE | CGATGGGTCCAGGATAGACATT  |
| <i>Usp16</i> | FORWARD | CTGCCAAGACTGTAAGACTGAC  |
|              | REVERSE | GGTGTCTGTAGTGCTTCAAG    |
| <i>Usp17</i> | FORWARD | CCAGAAGAGACTGGAGGGGA    |
|              | REVERSE | ACCACCATGTCTCAAAGACC    |
| <i>Usp18</i> | FORWARD | CAGGAGTCCCTGATTTGCGT    |
|              | REVERSE | CAGAGGCTTTGCGTCCTTATC   |
| <i>Usp19</i> | FORWARD | TGAACCAGAGCAGGTACGTT    |
|              | REVERSE | CTGCACCTCGTGTAGCAGG     |
| <i>Usp20</i> | FORWARD | TGGAAGTGCATAGGGGAGGTG   |
|              | REVERSE | ACTGGCAGGTTCCCTTAGATT   |
| <i>Usp21</i> | FORWARD | AACTCCATGTTACGACCTTTGC  |
|              | REVERSE | AAGGGGACCTCTAGGACGAGA   |
| <i>Usp22</i> | FORWARD | TCTTTCTGTCGGATAGGCACC   |
|              | REVERSE | GCCCTGAGTAAAACCTCCTGGA  |
| <i>Usp24</i> | FORWARD | GCTGGAAAGCCGCGTTTTG     |
|              | REVERSE | CAAGTCTGGCTAAGTAGGTGGA  |
| <i>Usp25</i> | FORWARD | GGAGGAGACAGGCTATTACCA   |
|              | REVERSE | TCAAGGCAATCGCTCTCTGAA   |
| <i>Usp26</i> | FORWARD | CTCAAGTCCAGATGTGGAGTGC  |
|              | REVERSE | CTGGTCTTCGCCATAGGTTTG   |
| <i>Usp27</i> | FORWARD | CGACCAAACCTGAACTAGAACTT |
|              | REVERSE | CGTAAGCCGATGGTAAAGCTG   |
| <i>Usp28</i> | FORWARD | GGGTCCGAGAAGGAAAGCC     |
|              | REVERSE | CACGGAACGATCCGAAGGAAG   |
| <i>Usp29</i> | FORWARD | TCCGCAGCACAAAACAGGAG    |
|              | REVERSE | CTCACCACTAACCACTACGCC   |
| <i>Usp30</i> | FORWARD | GGGAGTGATCGGTGGGATTG    |
|              | REVERSE | TCTTCTCTCTGTAATGGGACC   |

---

|              |         |                          |
|--------------|---------|--------------------------|
| <i>Usp31</i> | FORWARD | GGAGTACACCCCGCAACAC      |
|              | REVERSE | TGCTTTACAGCATGGTTGAGG    |
| <i>Usp32</i> | FORWARD | AGTGAATCCGGGAGCTATGTT    |
|              | REVERSE | TTCCTGAGTGTATCTGGGACTTT  |
| <i>Usp33</i> | FORWARD | GCGCTTGTCAGGACTGTAAAG    |
|              | REVERSE | CAGCCAACATAGGAGCACC      |
| <i>Usp34</i> | FORWARD | GATATTGGTGGTCGTTTCATGTGT |
|              | REVERSE | TTGGCAAATTCGTAAAGGAAAGC  |
| <i>Usp35</i> | FORWARD | GGGAAGAACATTGACAAGTGGA   |
|              | REVERSE | GCGAAACCTCGATCAAGATGC    |
| <i>Usp36</i> | FORWARD | CCAACAGCGGCAATGCTATC     |
|              | REVERSE | CATCGCATCAATGGTGTACCG    |
| <i>Usp37</i> | FORWARD | TGCAGACTGGGATTACAAAGTG   |
|              | REVERSE | ACGAGCAGGCTGACTCTATTG    |
| <i>Usp38</i> | FORWARD | GCCCCTCAAGCGGATGATT      |
|              | REVERSE | GGGTCGTCAGGTCAAACATGG    |
| <i>Usp39</i> | FORWARD | GTCACTGCCCGTACTTGATA     |
|              | REVERSE | GTATGCGTTGATGTGCGAGAG    |
| <i>Usp40</i> | FORWARD | TGACCGACTGGTTAAAGCAGC    |
|              | REVERSE | GCTAGTATCCTTGTAGCGTTCAC  |
| <i>Usp42</i> | FORWARD | AGGCGGTCTCACCTGAAGA      |
|              | REVERSE | CACTGGCCCTAATGGAAGTGT    |
| <i>Usp43</i> | FORWARD | GACTTGCCACACTGCCTAAAA    |
|              | REVERSE | AGTGACACTCAAGAATCTCGTCT  |
| <i>Usp44</i> | FORWARD | AATGGTACTGTATGGTCTGCAAC  |
|              | REVERSE | TTCAGTGCGTGCTCTTGGATG    |
| <i>Usp45</i> | FORWARD | ATGCGGGTAAAAGATCCATCAA   |
|              | REVERSE | ACGTTAGACCTACAGCAATGTCA  |
| <i>Usp46</i> | FORWARD | ATGACTGTCCGAAACATCGCC    |
|              | REVERSE | TTGACCAATCCGAAGTAGTGTTT  |
| <i>Usp47</i> | FORWARD | GATGTGATTCCCTTGGATTGCT   |
|              | REVERSE | AACCCCATTTGGTGTATCTTCTTC |
| <i>Usp48</i> | FORWARD | TGTGGGCTTGACTAACCTGG     |
|              | REVERSE | AAGCTCCAAGTTGAGGAACCA    |
| <i>Usp49</i> | FORWARD | AGTTCCGGGAATGTTTCTGA     |
|              | REVERSE | CTCCTTACTGACAACTCTGCG    |
| <i>Usp50</i> | FORWARD | GCCTACCTGATGACAGATATGTG  |
|              | REVERSE | TGCCAACAGCCGACAGAAAT     |
| <i>Usp51</i> | FORWARD | CCCACGTCGGAGAACTTAACA    |
|              | REVERSE | GACAAGCAGCCGGGATAGAAG    |
| <i>Usp52</i> | FORWARD | CAGAGGTGGAACCGCTTCAT     |
|              | REVERSE | TGAGCAGAACTGCCTCCAG      |
| <i>Usp53</i> | FORWARD | AAGCCTAGCGGCAATCTTGG     |
|              | REVERSE | GTTCTGCCCTGGCTCGTTTA     |

|                |         |                         |
|----------------|---------|-------------------------|
| <i>Usp54</i>   | FORWARD | CCTGAGCTCGAATGGGTTGT    |
|                | REVERSE | GAGACACCACAAGCCGAGAA    |
| $\beta$ -actin | FORWARD | GGCTGTATTCCCCTCCATCG    |
|                | REVERSE | CCAGTTGGTAAACAATGCCATGT |

94

95 **Table S2. shRNA oligonucleotides**

|                           | 5'         | Stem                      | Loop   | Stem                   | 3'     |
|---------------------------|------------|---------------------------|--------|------------------------|--------|
| <b><i>Usp18</i> shRNA</b> |            |                           |        |                        |        |
| <i>Usp18</i> -shRNA-1 F   | CCGG       | GATGGCTGACTTTGGT<br>CATT  | CTCGAG | TAATGACCAAAGTCAGCCATC  | TTTTTG |
| <i>Usp18</i> -shRNA-1 R   | AATTCAAAAA | GATGGCTGACTTTGGT<br>CATT  | CTCGAG | TAATGACCAAAGTCAGCCATC  | —      |
| <i>Usp18</i> -shRNA-2 F   | CCGG       | GCTGCATTTCAACGA<br>GAATAA | CTCGAG | TTATTCTCGTTGAAATGCAGC  | TTTTTG |
| <i>Usp18</i> -shRNA-2 R   | AATTCAAAAA | GCTGCATTTCAACGA<br>GAATAA | CTCGAG | TTATTCTCGTTGAAATGCAGC  | —      |
| <i>Usp18</i> -shRNA-3 F   | CCGG       | CAGGTTCTGAAGCTG<br>ACTCAT | CTCGAG | ATGAGTCAGCTTCAGAACCTG  | TTTTTG |
| <i>Usp18</i> -shRNA-3 R   | AATTCAAAAA | CAGGTTCTGAAGCTG<br>ACTCAT | CTCGAG | ATGAGTCAGCTTCAGAACCTG  | —      |
| <b><i>Usp21</i> shRNA</b> |            |                           |        |                        |        |
| <i>Usp21</i> -shRNA-1 F   | CCGG       | ATGGCTCCTTCCACAT<br>GATAT | CTCGAG | ATATCATGTGGAAGGAGCCAT  | TTTTTG |
| <i>Usp21</i> -shRNA-1 R   | AATTCAAAAA | ATGGCTCCTTCCACAT<br>GATAT | CTCGAG | ATATCATGTGGAAGGAGCCAT  | —      |
| <i>Usp21</i> -shRNA-2 F   | CCGG       | GTGCTCCATCTGAACC<br>GATTT | CTCGAG | AAATCGGTTTCAGATGGAGCAC | TTTTTG |
| <i>Usp21</i> -shRNA-2 R   | AATTCAAAAA | GTGCTCCATCTGAACC<br>GATTT | CTCGAG | AAATCGGTTTCAGATGGAGCAC | —      |
| <i>Usp21</i> -shRNA-3 F   | CCGG       | CCTAAGGTTAAGTCG<br>CCCTCG | CTCGAG | CGAGGGCGACTTAACCTTAGG  | TTTTTG |
| <i>Usp21</i> -shRNA-3 R   | AATTCAAAAA | CCTAAGGTTAAGTCG<br>CCCTCG | CTCGAG | CGAGGGCGACTTAACCTTAGG  | —      |
| <b>Negative control</b>   |            |                           |        |                        |        |
| shRNA Scramble F          | CCGG       | CCTAAGGTTAAGTCG<br>CCCTCG | CTCGAG | CGAGGGCGACTTAACCTTAGG  | TTTTTG |
| shRNA Scramble R          | AATTCAAAAA | CCTAAGGTTAAGTCG<br>CCCTCG | CTCGAG | CGAGGGCGACTTAACCTTAGG  | —      |

96

97

98 **Table S3. siRNA oligonucleotides**

|                     | sense (5'-3')         | antisense (5'-3')      |
|---------------------|-----------------------|------------------------|
| <i>Usp4</i> siRNA-1 | CGCAGUGGUAUCUUAUUGATT | UCAAUAAAGAUACCACUGCGTT |
| <i>Usp4</i> siRNA-2 | GAGCAAGCUAGACAACACUTT | AGUGUUGUCUAGCUUGCUCTT  |
| <i>Usp4</i> siRNA-3 | GCGUAAAGAAGAAGCCUUATT | UAAGGCUUCUUCUUUACGCTT  |
| Negative control    | UUCUCCGAACGUGUCACGUTT | ACGUGACACGUUCGGAGAATT  |

99
