# Supplementary material for: The osteoprotective role of USP26 in coordinating bone formation and resorption
Source: PubMed Central journal article supplement (PMC9177963; doi:10.1038/s41418-021-00904-x), 2022-01-29
Supplement: 41418_2021_904_MOESM3_ESM.pdf [file 41418_2021_904_MOESM3_ESM.pdf]

Please complete the table below to indicate the contributions of all named authors to the figures.

Figure 1:

|  |
|--|
|  |
|--|

Figure 2:

|  |
|--|
|  |
|--|

Figure 3:

|  |
|--|
|  |
|--|

Figure 4:

|  |
|--|
|  |
|--|

Figure 5:

|  |
|--|
|  |
|--|

Figure 6:

|  |
|--|
|  |
|--|

Signed for and on behalf of the Author(s):

*Changwei Li*

Print Name:

|  |
|--|
|  |
|--|

Date:

|  |
|--|
|  |
|--|
